# Supplementary material
Source: PubMed Central journal article supplement (PMC3911532)
Supplement: JVI.01249-13_zjv004148635so2.pdf [file JVI.01249-13_zjv004148635so2.pdf]

### **Supplemental Data**

VIDEO S1 Close interaction between vimentin and NS4A upon DENV-2 infection. Vimentin (green) filaments reorganise and cluster together and NS4A (red) aligns closely on the remaining filamentous vimentin at 24 h post-infection. Serial xy-planes were performed to obtain a confocal 3D reconstruction of the vimentin scaffold using LSCM. 30 optical slices of 0.3  $\mu\text{m}$  z-section were obtained, and 3D images were further processed for the making of video using Imaris software. Snapshot of this video is shown in Figure 3C.
